# Supplementary material
Source: PubMed Central journal article supplement (PMC196556)

Supplementary figure 1

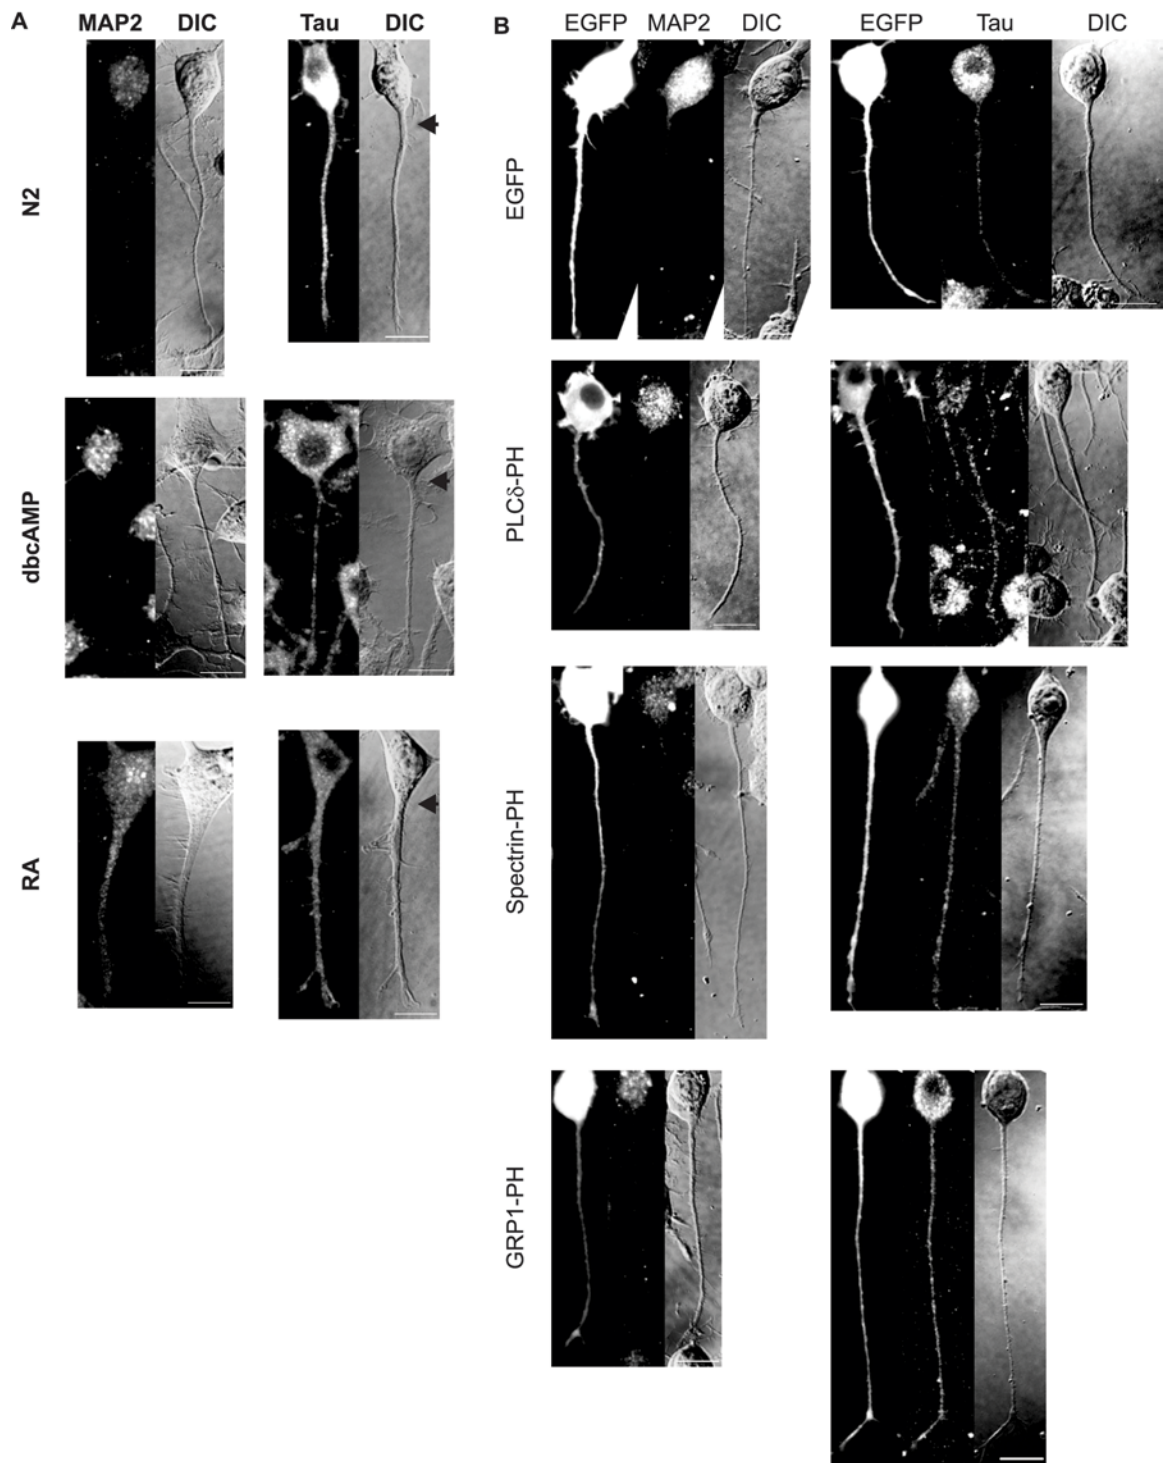

Supplement: mbc_E02-10-0638_2.pdf [file mbc_E02-10-0638_2.pdf]

Supplementary Figure 2

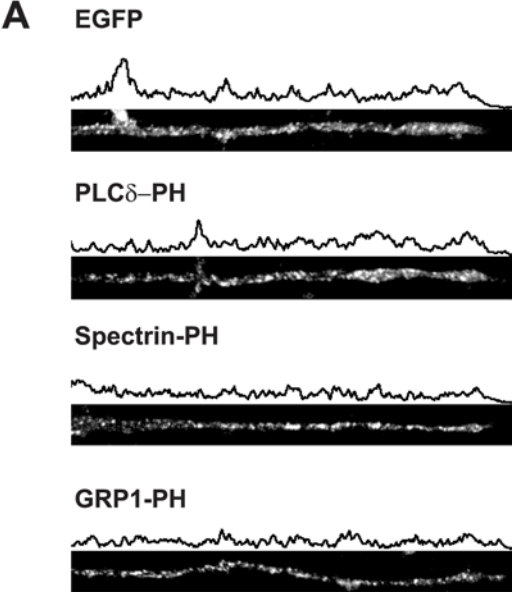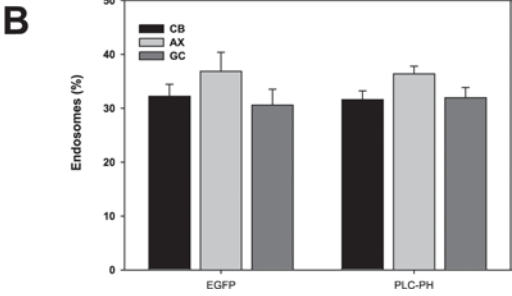

Supplement: mbc_E02-10-0638_3.pdf [file mbc_E02-10-0638_3.pdf]

supplementary figure 3

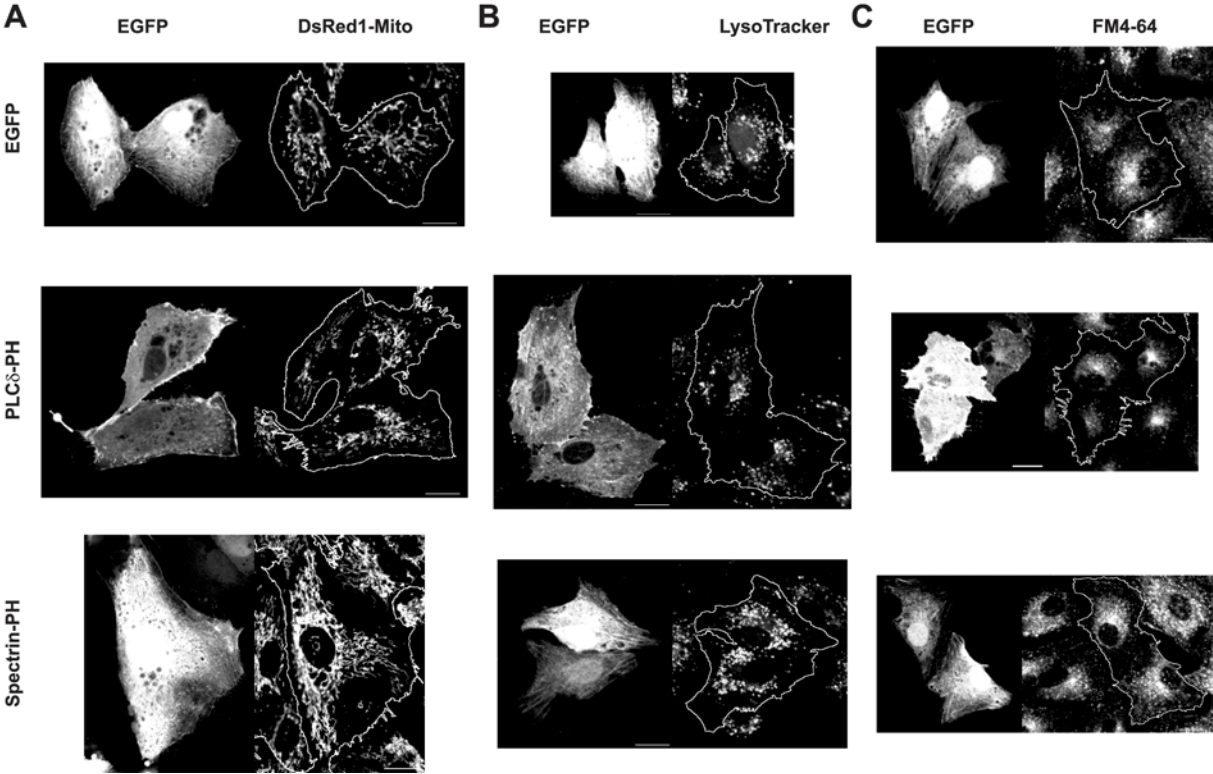

Supplement: mbc_E02-10-0638_4.pdf [file mbc_E02-10-0638_4.pdf]
